# Supplementary material for: Prevalence of Antibiotic-Resistant Shigella spp. in Bangladesh: A Systematic Review and Meta-Analysis of 44,519 Samples
Source: MDPI journal article supplement (doi:10.3390/antibiotics12050817), 2023-04-26
Supplement: s1 [file s1]

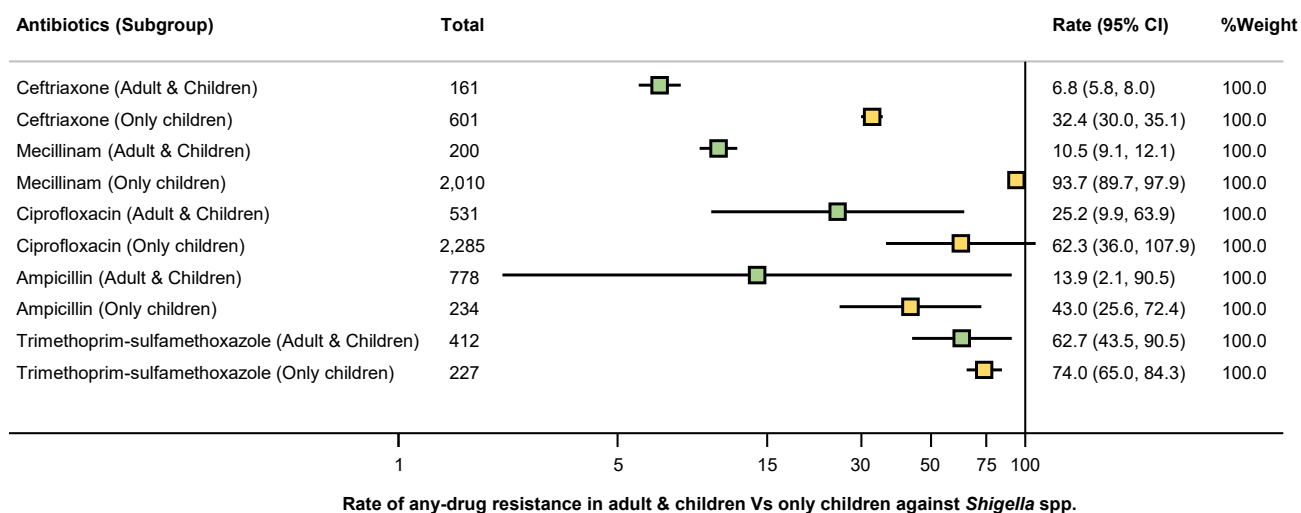

**Supplementary Figure S1.** Subgroup analysis estimating the prevalence of any-drug resistance against *Shigella* spp. in adult and children vs children only.
