# Supplementary material for: Prevalence of Antibiotic-Resistant Shigella spp. in Bangladesh: A Systematic Review and Meta-Analysis of 44,519 Samples
Source: MDPI journal article supplement (doi:10.3390/antibiotics12050817), 2023-04-26
Supplement: s1 [file s1]

|                     |  |  |  |  |  |  |  |  |      |
|---------------------|--|--|--|--|--|--|--|--|------|
| <b>Dhar 1992</b>    |  |  |  |  |  |  |  |  | 57.1 |
| <b>Bennish 1992</b> |  |  |  |  |  |  |  |  | 71.4 |
| <b>Munshi 1987</b>  |  |  |  |  |  |  |  |  | 57.1 |
| <b>Tacket 1984</b>  |  |  |  |  |  |  |  |  | 57.1 |
| <b>Stoll 1982</b>   |  |  |  |  |  |  |  |  | 71.4 |

Yes

No

Not  
applicable

Q1: Were the criteria for inclusion in the sample clearly defined?

Q2: Were the study subjects and the setting described in detail?

Q3: Was the exposure measured in a valid and reliable way?

Q4: Were objective, standard criteria used for measurement of the condition?

Q5: Were confounding factors identified?

Q6: Were strategies to deal with confounding factors stated?

Q7: Were the outcomes measured in a valid and reliable way?

Q8: Was appropriate statistical analysis used?
