# Supplementary material for: Prevalence of Antibiotic-Resistant Shigella spp. in Bangladesh: A Systematic Review and Meta-Analysis of 44,519 Samples
Source: MDPI journal article supplement (doi:10.3390/antibiotics12050817), 2023-04-26
Supplement: s1 [file s1]

**Table S3.** Quality assessment of cohort studies using the Joanna Briggs Institute critical appraisal tool

| Study ID     | Q1 | Q2  | Q3 | Q4 | Q5 | Q6 | Q7 | Q8      | Q9 | Q10            | Q11 | Yes (%) |
|--------------|----|-----|----|----|----|----|----|---------|----|----------------|-----|---------|
| Pholwat 2022 |    |     |    |    |    |    |    |         |    |                |     | 40.0    |
| Houpt 2020   |    |     |    |    |    |    |    |         |    |                |     | 66.7    |
|              |    | Yes |    | No |    |    |    | Unclear |    | Not applicable |     |         |

**Q1:** Were the two groups similar and recruited from the same population?

**Q2:** Were the exposures measured similarly to assign people to both exposed and unexposed groups?

**Q3:** Was the exposure measured in a valid and reliable way?

**Q4:** Were confounding factors identified?

**Q5:** Were strategies to deal with confounding factors stated?

**Q6:** Were the groups/participants free of the outcome at the start of the study (or at the moment of exposure)?

**Q7:** Were the outcomes measured in a valid and reliable way?

**Q8:** Was the follow up time reported and sufficient to be long enough for outcomes to occur?

**Q9:** Was follow up complete, and if not, were the reasons to loss to follow up described and explored?

**Q10:** Were strategies to address incomplete follow up utilized?

**Q11:** Was appropriate statistical analysis used?
